# Supplementary material for: Potential role of medicinal plants and their constituents in the mitigation of SARS-CoV-2: identifying related therapeutic targets using network pharmacology and molecular docking analyses
Source: Royal Society of Chemistry journal article supplement (doi:10.1039/d0ra05126h), 2020-01-01
Supplement: d0ra05126h2.xlsx [file d0ra05126h2.xlsx]

## Sheet: Sheet1
Plant name	Title	Entry ID	docking score
Cichorium intybus	Delphinidin 3,5-diglycosides; 3,5-Bis-O-(6-O-malonyl-&beta;-D-glucopyranoside)	3CLpro	-11.844
Schinus molle	hyperin 6''-O-gallate	3CLpro	-11.737
Allium myrianthum	rutin	3CLpro	-12.632
Anastatica hierochuntica	rutin	3CLpro	-12.632
Liquorice	rutin	3CLpro	-12.632
Marrubium vulgare	VERBASCOSIDE	3CLpro	-11.721
Olea europaea	VERBASCOSIDE	3CLpro	-11.721
Artemisia herba-alba	isoschaftoside	3CLpro	-11.412
Artemisia judaica	isoschaftoside	3CLpro	-11.412
Cotula cinerea	isoschaftoside	3CLpro	-11.412
Sonchus macrocarpus	luteolin 7-glucosylglucuronide	3CLpro	-11.409
Jatropha multifida	jatrophenol III	3CLpro	-11.363
Foenugreek	6-C-L-Arabinopyranosyl-8-C-?-D-galactopyranosyl-4',5,7-trihydroxyflavone	3CLpro	-11.337
Tamarix nilotica	gemin D	3CLpro	-11.284
Quercus suber	tellimagrandin I	3CLpro	-11.119
Tamarix nilotica	tellimagrandin I	3CLpro	-11.119
Terminalia species	tellimagrandin I	3CLpro	-11.119
Hibiscus sabdariffa	Delphinidin 3-glycosides; 3-O-[?-D-Xylopyranosyl-(1?2)-?-D-glucopyranoside]	3CLpro	-11.061
Artemisia herba-alba	quercetin 3-glucoside	3CLpro	-11.015
Epilobium hirsutum	myricetin 3-O-glucuronide	3CLpro	-11.015
Brickellia microphylla	quercetagetin-6-methyl ether 3-O-beta-D-digalactoside	3CLpro	-10.953
Schinus molle	isoquercitrin 6''-O-p-hydroxybenzoate	3CLpro	-10.892
Lepidium sativum	Kaempferol 3,7-diglycosides; 3-O-&beta;-D-Xylopyranoside, 7-O-&alpha;-L-rhamnopyranoside	3CLpro	-10.891
Cleome species	kaempferol-3-rutinoside	3CLpro	-10.88
Tribulus terrestris	kaempferol-3-rutinoside	3CLpro	-10.88
Schinus molle	hyperin	3CLpro	-10.831
Crataegus sinaica	hyperoside	3CLpro	-10.811
Allium cepa	Cyanidin 3,5-diglycosides; 3,5-Di-O-&beta;-D-glucopyranoside	3CLpro	-10.775
Olea europaea	PAEONIDIN-3-GLUCOSIDE	3CLpro	-10.762
Olea europaea	CYANIDIN-3-RUTINOSIDE	3CLpro	-10.695
Cicer arientinum	Astragalin; 6''-O-Malonoyl	3CLpro	-10.684
Hibiscus sabdariffa	Cyanidin 3,5-diglucoside	3CLpro	-10.658
Licorice	Rocymosin B.1	3CLpro	-11.844
Docus carrota	Pyranocyanin D aglycone; 3-O-[&beta;-D-Xylopyranosyl-(1&rarrow;2)-&beta;-D-galactopyranoside]	3CLpro	-10.619
Licorice	isoliquiritigenin	3CLpro	-10.612
Licorice	5,7-Dihydroxy-8-prenylflavanone; (S)-form	3CLpro	-10.606
Cuscuta chinenesis	11-Hydroxytetradecanoic acid; (S)-form, O-[&alpha;-L-Rhamnopyranosyl-(1&rarrow;3)-&alpha;-L-rhamnopyranosyl-(1&rarrow;2)-&beta;-D-glucopyranosyl-(1&rarrow;2)-&beta;-D-glucopyranoside]	3CLpro	-10.588
Pimpinella anisum	ISOQUERCITRIN	3CLpro	-10.583
Licorice	Isoliquiritin.1	3CLpro	-10.559
Docus carrota	2,5-Bis(3,4-dihydroxyphenyl)-3,8-dihydroxypyrano[4,3,2-de]-1-benzopyrylium(1+); 3-O-[&beta;-D-Xylopyranosyl-(1&rarrow;2)-&beta;-D-galactopyranoside]	3CLpro	-10.538
Licorice	ASTRAGALIN	3CLpro	-10.536
Marrubium vulgare	VERBASCOSIDE	Plpro	-14.041
Olea europaea	VERBASCOSIDE	Plpro	-14.041
Cichorium intybus	Tartaric acid; (2S,3S)-form, Mono(3,4-dihydroxycinnamoyl)	Plpro	-11.148
Cynara scolymus	luteolin 7-rutinoside	Plpro	-13.883
Licorice	Glychionide A.1	Plpro	-10.832
Ephedra alata	herbacetin 7-glucoside	Plpro	-10.674
Salvia triloba	luteolin 7-glucuronide	Plpro	-10.658
Licorice	Rocymosin B.1	Plpro	-10.593
Centaurea furfuracea	hispidulin-7-O-glucoside	Plpro	-10.504
Artemisia judaica	apigenin 7-glucuronide	Plpro	-10.49
Lepidium sativum	Kaempferol 3,7-diglycosides; 3-O-&beta;-D-Xylopyranoside, 7-O-&alpha;-L-rhamnopyranoside	Plpro	-10.417
Mtricaria chamomilla	6-HYDROXY-LUTEOLIN-7-GLUCOSIDE",	Plpro	-10.402
Globularia alypum	eriodictyol 7-O-sophoroside	Plpro	-10.338
Phyllanthus emblica	1,6-di-O-galloyl-beta-D-glucose	Plpro	-10.255
Licorice	Licoagroside B	Plpro	-10.201
Tetraclinis articulata	myricitrin	Plpro	-10.182
Olea europaea	Luteolin 7,4'-diglucoside;	Plpro	-10.18
Cynara scolymus	5321 cynaroside	Plpro	-10.162
Allium cepa	N2-?-Glutamylarginine; L,L-form	Plpro	-10.154
Apium graveolens	APIGENIN-7-APIOSYLGLUCOSIDE",	Plpro	-10.139
Podocarpus gracilior	podocarpusflavone A	Plpro	-10.041
Licorice	Dihydrorhaponticin.1	Plpro	-10.035
Anastatica hierochuntica	anastatin A	Plpro	-10.027
Centaurea incana	3'-methyl myricetin 7-O-glucoside	Plpro	-9.993
Nigrospora sphaerica	nigrosphaerin A	Plpro	-9.987
Licorice	Oroxindin.1	Plpro	-9.978
Ferula Asafoetida	8-ACETOXY-5-HYDROXYUMBELLIPRENIN	Plpro	-9.967
Vitex agnus-castus	Isoorientin; 6''-O-(3,4-Dihydroxy-E-cinnnamoyl)	Plpro	-9.962
Mtricaria chamomilla	PATULETIN-7-GLUCOSIDE	Plpro	-9.952
Licorice	Licoricidin.1	Plpro	-9.941
Cicer arientinum	chiro-Inositol; D-form, 4-Me, 2-O-[&alpha;-D-galactopyranosyl-(1&rarrow;6)-&alpha;-D-galactopyranosyl-(1&rarrow;6)-&alpha;-D-galactopyranoside]	Plpro	-9.93
Phoenix dactylifera	diosmetin 7-O-beta-D-apiofuranoside	Plpro	-9.923
Pallenis spinosa	tricin 7-O-beta-D-glucoside	Plpro	-9.922
Licorice	Glycycoumarin.1	Plpro	-9.894
Licorice	Glucoliquiritin apioside.1	Plpro	-9.887
Marrubium vulgare	vitexin	Plpro	-9.886
Cichorium intybus	Cyanidin 3-glycosides; 3-O-(6-O-Malonyl-&beta;-D-glucopyranoside)	RdRp	-11.541
Cichorium intybus	Tartaric acid; (2S,3S)-form, Mono(3,4-dihydroxycinnamoyl)	RdRp	-10.664
Foenugreek	Fenugreekine	RdRp	-9.894
Tribulus terrestris	Isorhamnetin 3-glycosides; Tri- and higher saccharides, 3-O-[&beta;-D-Glucopyranosyl-(1&rarrow;6)-&beta;-D-glucopyranosyl-Isoorientin 6-O''-beta-D-glucopyranoside	RdRp	-9.797
Eruca sativa	Isoquercitrin	RdRp	-9.785
Allium cepa	Kaempferol 3,7-diglycosides; Trisaccharides, 3-O-[?-D-Glucopyranosyl-(1?2)-?-D-glucopyranoside], 7-O-?-D-glucuronopyranoside	RdRp	-9.766
Hibiscus sabdariffa	Cyanidin 3,5-diglucoside	RdRp	-9.754
Mtricaria chamomilla	APIGENIN-7-O-RUTINOSIDE",	RdRp	-9.747
Xanthium spinosum	2,15-Dihydroxy-16-kaurene-18,19-dioic acid; (ent-2&alpha;,15&beta;)-form, 2-O-[3-Methylbutanoyl-(&rarrow;2)-3-sulfo-&beta;-D-glucopyranoside]	RdRp	-9.738
Blepharis ciliaris	blephariside A	RdRp	-9.732
Allium cepa	Cyanidin 3-glycosides; Disaccharides, 3-O-[?-D-Glucopyranosyl-(1?3)-6-O-(methylmalonyl)-?-D-glucopyranoside]	RdRp	-9.611
Apium graveolens	ISOCITRIC-ACID	RdRp	-9.588
Licorice	Glycyrrhizic acid.1	RdRp	-9.556
Medicago sativa	Kaempferol-O-β-D-Glucuronopyranoside	RdRp	-9.544
Tribulus terrestris	Terrestric acid	RdRp	-9.527
Cleome species	kaempferol-3,7-dirhamnoside	RdRp	-9.509
Foenugreek	luteolin 8-C-β-glucopyranoside	RdRp	-9.493
Fraxinus oxycarba	fraxicarboside A	RdRp	-9.485
Petroselinum crispum	Cosmosiin; 6''-O-Malonyl	RdRp	-9.484
Apium graveolens	MALIC-ACID	RdRp	-9.475
Peganum harmala	5,7-Dihydroxy-4'-methoxyflavone; 7-O-[6-O-Acetyl-&beta;-D-glucopyranosyl-(1&rarrow;2)-[&alpha;-L-rhamnopyranosyl-(1&rarrow;4)]-[&beta;-D-glucopyranosyl-(1&rarrow;6)]-&beta;-D-glucopyranoside]	RdRp	-9.441
Cynara cardunculus	apigenin-7-O-malonyl glucoside	RdRp	-9.43
Olea europaea	GALLIC-ACID	RdRp	-9.418
Medicago sativa	4',5,7-Trihydroxy-3',5'-dimethoxyflavone; 7-O-[4-Hydroxy-3,5-dimethoxy-E-cinnamoyl-(→2)-β-D-glucuronopyranosyl-(1→2)-β-D-glucuronopyranoside]	RdRp	-9.412
Artemisia judaica	apigenin 7-gentiobioside	RdRp	-9.403
Artemisia judaica	apigenin 7-glucuronide	RdRp	-9.375
Licorice	Rocymosin B.1	RdRp	-9.361
Scrophularia saharae	scropolioside D	RdRp	-9.31
Salvia triloba	luteolin 7-glucuronide	RdRp	-9.298
Tribulus terrestris	quercetin-3-rhamnogentiobioside	RdRp	-9.278
Marrubium vulgare	35 acteoside	RdRp	-9.256
Terminalia species	terflavin B	RdRp	-9.21
Zingiber officinale	7-Hydroxy-1,7-bis(4-hydroxyphenyl)-5-heptene-3-sulfonic acid; (3R,5E,7?)-form	RdRp	-9.202
Licorice	Rhamnoliquiritin.1	RdRp	-9.165
Randonia africana	sagittatin A	RdRp	-9.15
Licorice	Rocymosin B.1	RdRp	-9.146
Allium cepa	Furost-5-ene-1,3,22,26-tetrol; (1&beta;,3&beta;,22&beta;,25R)-form, 1-O-&beta;-D-Galactopyranoside, 3-O-&alpha;-L-rhamnopyranoside	RdRp	-9.135
Lepidium sativum	Kaempferol 3,7-diglycosides; 3-O-&beta;-D-Xylopyranoside, 7-O-&alpha;-L-rhamnopyranoside	RdRp	-9.106
Tribulus terrestris	Quercetin 3,7-diglycosides; 3-O-[&beta;-D-Glucopyranosyl-(1&rarrow;6)-&beta;-D-glucopyranoside], 7-O-&beta;-D-glucopyranoside	RdRp	-9.085
Allium cepa	Cyanidin 3-glycosides; Disaccharides, 3-O-[?-D-Glucopyranosyl-(1?3)-6-O-(methylmalonyl)-?-D-glucopyranoside]	RdRp	-9.08
Docus carrota	Pyranocyanin D aglycone; 3-O-[&beta;-D-Xylopyranosyl-(1&rarrow;2)-&beta;-D-galactopyranoside]	RdRp	-9.062
